# Supplementary material
Source: Springer Nature journal article supplement (https://www.springermedizin.de/resource/supplementary/12939_2010_166_MOESM2_ESM.pdf/9551632)
Supplement: MOESM2 [file 9551632]

a. Antenatal care from a skilled provider

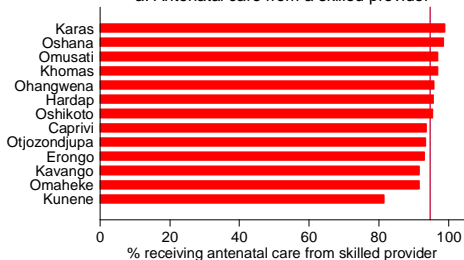

b. Delivery by skilled provider

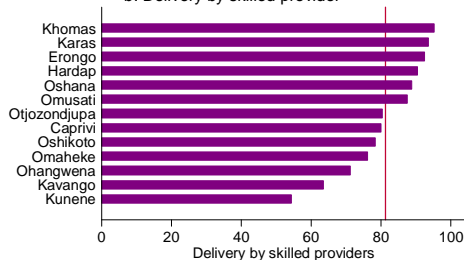

c. Delivery by caesarean section

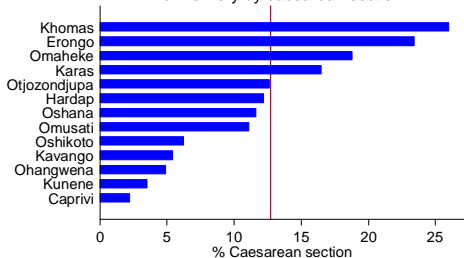

d. Women receiving postnatal checkup

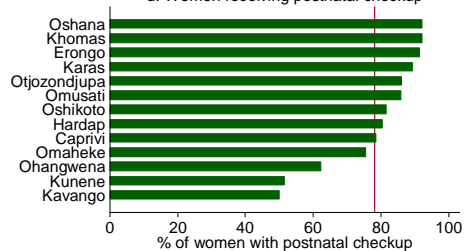

Note: the vertical lines indicate the mean values of each variable

Source of data: Namibia DHS 2006-07
